# A cytoplasmic protein kinase in *Chlamydomonas* couples engagement of ciliary receptors to rapid cellular responses

Mayanka Awasthi<sup>1</sup>, Peeyush Ranjan<sup>1</sup>, Simon Kelterborn<sup>2,3</sup>, Peter Hegemann<sup>2</sup> and William J. Snell<sup>1\*</sup>

<sup>1</sup> Department of Cell Biology and Molecular Genetics, University of Maryland, College Park, MD

<sup>2</sup> Experimental Biophysics, Institute for Biology, Humboldt-Universität zu Berlin, Berlin, Germany.

<sup>3</sup> Charité – Universitätsmedizin Berlin, Institute of Translational Physiology, Berlin, Germany

\*Correspondence: [wsnell1@umd.edu](mailto:wsnell1@umd.edu)

## Abstract

The principal function of the primary cilium is to convert cues from the extracellular milieu into changes in cyclic nucleotide concentration and cytoplasmic responses, but fundamental questions remain about the mechanisms of transmission of cilium-to-cytoplasm signals. During fertilization in *Chlamydomonas reinhardtii*, ciliary adhesion between *plus* and *minus* gametes triggers an immediate ~10-fold increase in cellular cAMP and activation for cell fusion. Here, we identify Gamete-Specific Protein Kinase (GSPK) as an essential link between ciliary receptor engagement and gamete activation. The ciliary adhesion-induced increase in cAMP and cell fusion are severely impaired in *gspk* mutants but fusion is rescued by a cell-permeable form of cAMP, indicating that GSPK functions upstream of the cAMP increase. GSPK is cytoplasmic, and, remarkably, the entire cellular complement is phosphorylated in less than 60 seconds after ciliary contact. Thus, a cytoplasmic protein kinase rapidly converts a ciliary membrane cue into a global cellular response.

## Introduction

The primary cilium is a spatially distinct cellular compartment specialized for receipt of extracellular signals. Its membrane houses multiple receptors essential for development and homeostasis<sup>1-3</sup>, including G-protein coupled receptors (GPCRs) responsible for vision<sup>4</sup>, olfaction<sup>5,6</sup>, growth factor receptor-activated pathways<sup>7</sup>, regulation of insulin and glucagon secretion in pancreatic islet cells<sup>8</sup>, and the sonic hedgehog (Hh) developmental pathway<sup>9</sup>. And, cilia participate in regulation of

36 epithelial cell proliferation in the liver, gall bladder, and kidney<sup>3,10,11</sup>. The ciliary  
37 compartment is unique in its combined functional and physical separation from the cell  
38 proper and is surrounded, not by cytoplasm, as are intracellular membrane-bounded  
39 organelles, but by the extracellular milieu. Moreover, the membrane at the connection  
40 between the cilium and the cell is packed with membrane protein complexes tightly  
41 linked to the dense array of underlying doublet microtubules of the ciliary axoneme<sup>12-</sup>  
42 <sup>14</sup>, thereby providing a regulatable barrier to membrane protein movement between  
43 the two domains.

44

45 Although the multiple signaling pathways initiated in the cilium vary widely across cell  
46 types in their mechanisms of activation and in their downstream outcomes, almost all  
47 are linked by their common function in regulating the concentrations of cyclic  
48 nucleotides, primarily the second messenger, cAMP. Increases in ciliary cAMP upon  
49 odorant binding by cilia of olfactory epithelial cells alter the activity of cyclic nucleotide-  
50 gated ion channels within the cilia, thereby inducing changes in membrane potential  
51 that are transmitted through the cell body and axons to generate a sense of smell<sup>15</sup>.  
52 Changes in ciliary cAMP upon activation of the cilium-based sonic hedgehog (Hh) and  
53 other GPCR-regulated pathways alter the activities of cAMP-dependent protein  
54 kinases and EPACs through multiple, complex mechanisms that lead to changes in  
55 protein secretion and gene expression<sup>16-18</sup>. During kidney tubule development, the  
56 increased cAMP that is a consequence of mutation of ciliary proteins polycystin I,  
57 polycystin 2, fibrocystin, and others leads to polycystic kidney disease (PKD)<sup>3,11</sup>. In  
58 spite of the importance of cilium-initiated, cAMP-dependent signaling pathways,  
59 however, fundamental questions remain about the mechanisms that couple receptor  
60 activity at the ciliary membrane to downstream responses in the cell.

61

62 In many unicellular organisms, including parasitic protozoans, ciliated protozoans, and  
63 green algae, cues received at cilia trigger changes in ciliary cAMP and cellular  
64 responses, and thus this ciliary signaling strategy is ancient<sup>19-23</sup>. During sexual  
65 reproduction in the bi-ciliated, unicellular green alga *Chlamydomonas reinhardtii*,  
66 interactions between the cilia of gametes of opposite mating types trigger a rapid, ~10-  
67 fold increase in intracellular cAMP that activates the gametes for cell-cell fusion<sup>22-26</sup>.  
68 Ciliary adhesion is mediated by binding between adhesion receptor SAG1 on the cilia

69 of *plus* gametes and adhesion receptor SAD1 on the cilia of *minus* gametes<sup>27,28</sup>.  
70 During this flirtation with multicellularity by a unicellular organism, the signaling  
71 pathway activated by SAG1-SAD1 interactions exhibits many of the hallmarks of  
72 pathways activated by receptor-ligand interactions in animal cells, including changes  
73 in the phosphorylation states of proteins and changes in protein location<sup>23-26,29,30</sup>.  
74 *Chlamydomonas* ciliary signaling has proved useful for understanding fundamental  
75 signaling properties of cilia. Studies over 35 years ago demonstrated the existence of  
76 a functional barrier between the *Chlamydomonas* plasma membrane and the ciliary  
77 membrane<sup>31,32</sup>. Related studies showed that, contrary to then emerging models,  
78 regulated movement of membrane proteins into the cilia does not require intraflagellar  
79 transport (IFT)<sup>33-35</sup>.

80

81 Studies with cilia isolated separately from naive (resting or unmixed) *plus* and *minus*  
82 gametes and from gametes soon after mixing have shown that within seconds after  
83 cilia adhere to each other, a cGMP-dependent protein kinase (PKG) becomes  
84 phosphorylated<sup>36,37</sup>. Although the protein kinase that phosphorylates the PKG and the  
85 substrates for the PKG are unknown, experimentally reducing expression of the PKG  
86 impairs gamete fusion<sup>37</sup>. Related studies have also shown that cilia isolated from  
87 *Chlamydomonas* gametes possess an adenylyl cyclase activity that is regulated by  
88 phosphorylation and dephosphorylation<sup>25,26</sup>. The in vitro activity of this as yet  
89 unidentified ciliary adenylyl cyclase is increased ~2-fold after *plus* and *minus* gametes  
90 are mixed together<sup>24</sup>, and even when isolated cilia are mixed together<sup>26</sup>. Moreover,  
91 cell bodies possess an adenylyl cyclase activity detected by in vitro assays, that is  
92 also increased ~2-fold by ciliary adhesion. The adhesion-induced increase in the  
93 ciliary adenylyl cyclase activity occurs within 1 minute after gametes are mixed  
94 together, and the increase in the activity of the cell body adenylyl cyclase occurs within  
95 ~2 minutes. Although, one model is that the cAMP formed in the cilia activates the  
96 adenylyl cyclase in the cell body<sup>24</sup>, the relationship between the ciliary adenylyl  
97 cyclase activity and gamete activation is unknown.

98

99 The primary cellular responses to the ciliary adhesion-triggered increase in cellular  
100 cAMP occur in the cell body within ~2 minutes after gametes are mixed together. The  
101 gametes release their cell walls<sup>38</sup>, mobilize pools of SAG1 and SAD1 from the plasma

102 membrane onto the ciliary membrane in a positive feedback mechanism that sustains  
103 and enhances adhesion,<sup>30,34,39-41</sup> and erect fusogenic membrane protuberances - -  
104 mating structures<sup>42</sup> - - as the gametes prepare for fusion to form a quadri-ciliated  
105 zygote (Fig. 1a). These cellular responses to ciliary adhesion (with the exception of  
106 gamete fusion) can be mimicked experimentally by incubation of gametes of a single  
107 mating type in a buffer containing a cell-permeable analogue of cAMP, dibutyryl cAMP  
108 (db-cAMP)<sup>22</sup>. As in other systems, however, the molecules and mechanisms that  
109 couple ciliary receptor engagement in *Chlamydomonas* gametes to cAMP-dependent  
110 cellular responses in the cytoplasm remain poorly understood.

111 Here, we report identification of a gamete-specific protein kinase, Gamete  
112 Specific Protein Kinase (GSPK), that is essential for this cilium-based signaling  
113 pathway. GSPK has sequence homology to mixed lineage protein kinases of animal  
114 cells and cell fractionation shows that it is a cell body protein. GSPK is basally  
115 phosphorylated in naive gametes and undergoes further phosphorylation within 1  
116 minute after *plus* and *minus* gametes are mixed together. Studies with *gspk* mutants  
117 indicate that the protein is essential for gamete fusion and functions downstream of  
118 ciliary adhesion and the adhesion-induced phosphorylation of ciliary PKG. Cell body  
119 responses to ciliary adhesion are strongly impaired in *gspk* gametes, and the rapid  
120 cell-cell fusion that typifies wild type gametes fails to occur in the mutants. Experiments  
121 showing rescue of fusion in mutant gametes by db-cAMP indicate that the downstream  
122 gamete activation machinery is intact in the mutants. Importantly, assays of cellular  
123 cAMP indicate that ciliary adhesion in the mutant gametes fails to induce the large  
124 increase in cAMP that typically accompanies ciliary adhesion. Our results indicate that  
125 GSPK is a cytoplasmic protein that rapidly detects ciliary adhesion and couples  
126 engagement of ciliary adhesion receptors to cAMP-dependent responses in the  
127 cytoplasm required for cell-cell fusion.

128

## 129 **Results**

### 130 **Identification of a gamete-specific protein kinase essential for fertilization in** 131 ***Chlamydomonas*.**

132 To identify protein kinases with a potential role in ciliary signaling during fertilization,  
133 we tested for a cell-cell fusion phenotype in several *minus* mating-type strains from  
134 the *Chlamydomonas* CLiP mutant library that were annotated to contain mutations in

135 protein kinase genes and that exhibited gamete-specific expression profiles<sup>43</sup> (Fig. 1b).  
136 Of 9 strains examined, gametes prepared from strain LMJ.RY0402.138658, which was  
137 annotated to have an insertion of the antibiotic resistance cassette *APHVIII* in gene  
138 Cre02.g104450 (whose encoded protein is GSPK), was strongly impaired in gamete  
139 fusion when mixed with wild type (*WT plus*) gametes (Fig. 1b, c). PCR analyses using  
140 gene-specific and cassette-specific sets of primers confirmed *APHVIII* cassette  
141 insertion into exon 3 in strain LMJ.RY0402.138658 (*gspk-1*) (Fig. 1d and  
142 Supplementary Table 1) and at the predicted insertion sites in two other independent  
143 CLiP library strains annotated to have insertions in Cre02.g104450,  
144 LMJ.RY0402.097798 (*gspk-2*; predicted insertion in exon 8) and LMJ.RY0402.039382  
145 (*gspk-3*; predicted insertion in the 3'UTR) (Supplementary Table 1 and Supplementary  
146 Fig. 1). Determination of the percent of gametes that fused after mixing with *WT plus*  
147 gametes confirmed that GSPK indeed was essential for the rapid fusion that typifies  
148 *WT* gametes. Nearly 70% of the cells in mixtures of *WT minus* gametes and *WT plus*  
149 gametes had fused to form quadri-ciliated cells (zygotes) within 10 minutes after  
150 mixing (Fig. 1c), whereas, fusion was less than 1% for each of the three *minus* mutant  
151 strains (Fig. 1c). The percent fusion in the mutants increased slightly by 60 minutes` (to  
152 15-18%) (Fig. 1c).

153  
154 Analysis of progeny from zygotes produced by crossing (Supplementary Fig. 2) *gspk-*  
155 *1 minus* gametes with *WT plus* gametes showed that both *minus* gametes and *plus*  
156 gametes bearing the *gspk-1* allele were defective in fusion when mixed with *WT*  
157 gametes of the opposite mating type (Fig. 1e). The identical phenotype was also found  
158 in a separate Cre02.g104450 mutant strain  $\Delta gspk-d2$  generated in *plus* cells by use  
159 of CRISPR methods (Fig. 1e; Supplementary Fig. 3). Thus, the *gspk* mutation  
160 segregated with the mutant phenotype, and *gspk* gametes of both mating types  
161 exhibited the fusion phenotype.

162  
163 Examination of sequence alignments showed that GSPK possessed the canonical  
164 protein kinase sub-domains of members of the protein kinase superfamily and was  
165 most closely related to mixed lineage protein kinases (Fig. 1f). GSPK contains ~151  
166 residues between subdomains IV and V absent in most other protein kinases that  
167 could be a potential regulatory motif. Use of NMT - The MYR Predictor

168 (<https://mendel.imp.ac.at/myristate/SUPLpredictor.htm>) to predict N-myristoylation  
169 sites indicated that the glycine at position 2 in GSPK (MGAVLSCCGEGTIGASHG) is  
170 a potential myristoylation site.

171

172 To investigate the cellular properties of GSPK, we introduced into *gspk* cells a  
173 transgene encoding an epitope-tagged form of GSPK, *GSPK-HA*, driven by the  
174 endogenous promoter. Immunoblotting of *gspk* and *gspk/GSPK-HA minus* gametes  
175 with anti-HA antibodies showed a tagged protein of the expected size, ~70 kDa, only  
176 in the cells bearing the transgene (Fig. 2a). Consistent with the analysis above  
177 indicating that mutation of *GSPK* was responsible for the fusion phenotype,  
178 introduction of the *GSPK-HA* transgene rescued fusion (Fig. 2a). Furthermore, and  
179 consistent with the transcriptome evidence (Fig. 1b), *GSPK-HA* was expressed only  
180 in gametes and not vegetative cells, and activation of the gametes by incubation in  
181 db-cAMP buffer for 1 hour brought about a substantial reduction in *GSPK-HA* protein  
182 levels (Fig. 2b).

183

184 **The entire cellular complement of GSPK is in the cytoplasm and is**  
185 **phosphorylated within 1 minute after ciliary receptor engagement.**

186

187 We used SDS-PAGE and immunoblotting to assess the phosphorylation state of  
188 *GSPK-HA* in naive *plus* gametes and in *plus* gametes undergoing ciliary adhesion at  
189 increasing times after mixing with *hap2 minus* gametes. As shown in Fig. 2c,  
190 incubation of lysates of naive *GSPK-HA* gametes with the protein de-phosphorylating  
191 enzyme, l-phosphatase, led to a shift in migration of *GSPK-HA* compared to the non-  
192 treated sample or compared to a sample incubated with the phosphatase and a  
193 phosphatase inhibitor. These results indicated that *GSPK* was basally phosphorylated  
194 in naive gametes.

195

196 Similar analysis showed that ciliary adhesion induced a further increase in *GSPK-HA*  
197 phosphorylation. Upon mixing the *GSPK-HA(+)* gametes with *hap2 minus* gametes,  
198 which are defective in gamete fusion because they fail to express the gamete fusogen,  
199 HAP2<sup>44</sup>, the basally phosphorylated *GSPK-HA* underwent a shift in migration (Fig. 2d).  
200 Remarkably, the entire cellular complement of *GSPK-HA* underwent the shift, and the



201 shift was detectable within 1 minute after mixing. Consistent with the shift being a  
202 consequence of phosphorylation, all of the GSPK-HA was shifted to the  
203 unphosphorylated form upon incubation of the lysates with l-phosphatase (Fig. 2e).

204

205 Given that all of the GSPK underwent the ciliary adhesion-induced rapid  
206 phosphorylation, it seemed likely that the protein itself would be localized in the  
207 organelles. Analysis by immunoblotting, however, of naive whole cells, cell bodies,  
208 and cilia indicated that GSPK was present in cell bodies, with little if any detectable in  
209 the cilia (Fig. 2f). Moreover, even though all other cell body events that occur during  
210 gamete interactions can be induced in gamete of a single mating type by incubation  
211 in db-cAMP<sup>32,41</sup>, phosphorylation of GSPK-HA was not induced by db-cAMP (Fig. 2g).  
212 (Cell wall loss was over 80% at 10 minutes in these samples). Thus, interactions  
213 between SAG1 and SAD1 at the surface of the cilia were rapidly transduced into  
214 phosphorylation of GSPK in the cell body, but GSPK phosphorylation was upstream  
215 of the increase in cAMP that drives gamete activation.

216

217

218 **The earliest biochemically detectable response in cilia to ciliary adhesion,**  
219 **phosphorylation of a cGMP-dependent protein kinase, does not require GSPK.**

220

221 To examine the cellular function of GSPK, we further investigated the phenotype of  
222 *gspk* mutants. Vegetative cells of both *plus* and *minus gspk* strains were  
223 indistinguishable from *wild-type* vegetative cells in size, appearance, motility, and  
224 growth. Moreover, all of the *gspk* mutant strains underwent normal gametogenesis to  
225 form gametes that were indistinguishable from the wild-type gametes in morphology  
226 and motility (not shown). Similarly, microscopic examination (Fig. 3ai) and a  
227 quantitative assay for ciliary adhesion (Fig. 3aii) showed that the *gspk minus* gametes  
228 underwent initial ciliary adhesion with *WT plus* gametes to nearly the same extent as  
229 did fusion-defective *hap2 minus* gametes with *WT plus* gametes. *gspk plus* gametes  
230 were similarly competent for ciliary adhesion with *WT minus* gametes (not shown).  
231 Thus, GSPK functioned downstream of SAG1-SAD1-dependent ciliary adhesion.

232

233 We tested whether the earliest experimentally detectable consequence of ciliary  
234 adhesion, phosphorylation of ciliary PKG (Fig. 3b), was intact in the *gspk* mutants.  
235 Cilia isolated from *WT plus* and *minus* gametes that had been mixed together for 3  
236 minutes and from *gspk* mutant *plus* and *minus* gametes mixed for the same time were  
237 assessed for tyrosine phosphorylation of PKG by an in vitro assay and immunoblotting  
238 with anti-phosphotyrosine antibodies<sup>36</sup>. As shown in Fig. 3c, phosphorylation of the  
239 105 kDa PKG was at very low levels in assays of cilia isolated from naive *plus* gametes  
240 and from naive *minus WT* gametes and in assays of separately isolated cilia from  
241 naive *plus* and *minus gspk* gametes. On the other hand, cilia isolated from the mixed  
242 *WT plus* and *minus* gametes and from the mixed *gspk plus* and *minus* gametes  
243 undergoing ciliary adhesion showed robust phosphorylation of PKG in the assays.  
244 Thus, the earliest biochemical response within cilia to SAG1-SAD1 interactions was  
245 independent of GSPK.

246

#### 247 **Ciliary adhesion by *gspk* gametes fails to induce the cell body responses** 248 **required for gamete fusion.**

249

250 Given that the block to fusion in the *gspk* mutants was downstream of initial ciliary  
251 events, we used bioassays to determine whether *gspk* gametes underwent the typical  
252 cell body responses to ciliary adhesion (Fig. 3b). Our wall loss assay indicated that  
253 cell wall release was severely impaired in the *gspk* gametes (Fig. 4a). Whereas nearly  
254 70% of the cells in samples of adhering *WT plus* gametes mixed with *hap2 minus*  
255 gametes had lost their walls at 10 minutes after mixing, fewer than 20% of the mixed  
256 *gspk* gametes had lost their walls. Similarly, mating structure activation, as measured  
257 by the appearance of the actin-filled microvillous-like fertilization tubules in *plus*  
258 gametes was substantially reduced in the *gspk* gametes (Fig. 4b). 30 minutes after  
259 mixing equal numbers of *WT plus* gametes with *hap2 minus* gametes, nearly 45% of  
260 the cells in the mixture possessed actin-staining mating structures (which meant that  
261 ~90% of the *plus* gametes had formed mating structure), but fewer than 3% of the  
262 *gspk plus* gametes had formed the structures (Fig. 4b and Supplementary Fig. 4).

263

264 We also investigated the ability of *gspk plus* gametes to recruit SAG1 from the cell  
265 body to the cilia, a response to ciliary signaling that maintains and enhances ciliary  
266 adhesion<sup>45</sup>. We obtained *gspk plus* cells bearing HA-tagged SAG1 from a cross



267 between *gspk(-)* gametes with *SAG1-HA(+)* gametes (Supplementary Fig. 2).  
268 *gspk/SAG1-HA(+)* gametes were mixed with fusion-defective *hap2(-)*gametes, and at  
269 0, 10, and 45 minutes after mixing, samples were harvested, fractionated, and whole  
270 cells, cell bodies, and cilia were analyzed by anti-HA immunoblotting. Samples from a  
271 mixture of adhering *SAG1-HA* and *hap2* gametes served as controls. As expected,  
272 immunoblots of equal amounts of protein showed that SAG1-HA was present at low  
273 levels in cilia compared to the cell bodies in the 0-time samples of both the *WT* and  
274 *gspk(+)* gametes (Fig. 4c). Moreover, at 10 minutes after mixing, SAG1-HA had been  
275 recruited into both the *WT* and the *gspk* cilia. On other hand, at 45 minutes after mixing  
276 the amount of SAG1-HA had increased in the cilia of the *WT plus* gametes, but the  
277 amount of SAG1-HA in the cilia of the *gspk* gametes had decreased (Fig. 4c). Thus,  
278 although it was dispensable for the initial, adhesion-induced recruitment of SAG1-HA  
279 to cilia, GSPK was required to sustain SAG1 recruitment.

280

281 Ciliary adhesion is dynamic, and sites of adhesion are constantly being formed and  
282 broken along the lengths of the cilia as the organelles release membrane vesicles  
283 (ciliary ectosomes) enriched in SAG1 and SAD1<sup>40</sup>. Maintenance of ciliary adhesion,  
284 thus, depends on recruitment of SAG1 from the inactive pool on the surface of the cell  
285 body membrane. Indeed, consistent with the decreased amount of SAG1-HA in the  
286 cilia of the *gspk* gametes at 30 minutes after mixing (Fig. 4c), examination by phase-  
287 contrast microscopy of the 30 minute samples of the *gspk/SAG1-HA plus* gametes  
288 mixed with the fusion-defective *hap2 minus* gametes samples indicated that many had  
289 become single cells. And, by 45 minutes few if any were in clusters. On the other hand,  
290 in the control sample of *WT plus* gametes mixed with fusion-defective *hap2 minus*  
291 gametes, the cells continued to adhere to each other and the clusters had grown even  
292 larger (Fig. 4d). Thus, both biochemical and functional evidence indicated that  
293 sustained recruitment of adhesion molecules during ciliary adhesion required GSPK.

294

295 Taken together, the results above suggested that GSPK functioned upstream of all of  
296 the cell body events in the gamete activation pathway. Consistent with this  
297 interpretation, when db-cAMP was added to *gspk* gametes, they underwent cell wall  
298 loss and mating structure activation similarly to *WT* gametes (Fig. 4a, b). Furthermore,  
299 in the presence of db-cAMP, *gspk plus* and *minus* gametes were fully capable of

300 undergoing cell-cell fusion (Fig. 4e), suggesting that GSPK was a positive regulator of  
301 cAMP. Indeed, assays for cellular cAMP showed that whereas the levels of this second  
302 messenger increased nearly 10-fold when *WT plus* and *minus* gametes were mixed  
303 together, the cAMP increase was transient and less than 2-fold when *plus* and *minus*  
304 *gspk* mutants were mixed together (Fig. 4f). Thus, the rapid increase in cellular cAMP  
305 triggered by ciliary adhesion and required for gamete activation depends on this  
306 protein kinase located in the cytoplasm.

307  
308

### 309 **Discussion**

310 We screened for cell-cell fusion defects in several *Chlamydomonas minus* mating type  
311 strains from the CLiP mutant library annotated to have disruptions in gamete-specific  
312 protein kinase genes. Out of 9 strains, we identified one, with a mutation in the mixed  
313 lineage protein kinase gene *GSPK*, that underwent ciliary adhesion with *plus* gametes  
314 similarly to *WT minus* gametes but was strongly impaired in cell-cell fusion. *gspk*  
315 mutants were rescued for gamete fusion by introduction of a transgene encoding an  
316 HA-tagged form of GSPK, *GSPK-HA*. Cell fractionation and immunoblotting showed  
317 that GSPK-HA was present in cell bodies, with little if any in cilia. Immunoblotting in  
318 combination with treatment of cell lysates with a phosphatase enzyme showed that  
319 GSPK-HA was basally phosphorylated in naive gametes and that the entire cellular  
320 complement of GSPK was additionally phosphorylated within 1 minute after *plus* and  
321 *minus* gametes were mixed together. GSPK-HA was not phosphorylated when  
322 gametes were activated with db-cAMP, and db-cAMP treatment rescued fusion when  
323 added to *gspk plus* and *minus* gametes, indicating that phosphorylation of GSPK was  
324 not mediated by cAMP, and that GSPK functions upstream of the large increase in  
325 cAMP that induces gamete activation.

326

327 One of the most surprising findings was that all of the GSPK was phosphorylated  
328 within 1 minute after the gametes were mixed together (Fig. 2). Ciliary adhesion and  
329 consequent phosphorylation events indeed were terminated at the times indicated,  
330 because the samples for the immunoblots were placed directly into SDS-PAGE  
331 sample buffer and immediately heated. This response to engagement of receptors in  
332 cilia is much slower than that of olfaction, and slightly faster than that reported for the

333 somatostatin receptor 3 pathway and the Hh pathway. In olfaction, the rapid increase  
334 in cAMP within the cilia of olfactory epithelial cells triggered by binding of odorants to  
335 their GPCRs leads to changes in plasma membrane potential detectable within 100  
336 ms<sup>46</sup>, nearly 3 orders of magnitude more rapid than for the GSPK response.

337

338 In the somatostatin pathway, mobilization of cytoplasmic  $\beta$ -arrestin 2 into cilia was  
339 detected by immunofluorescence within 4 minutes after addition of somatostatin to  
340 cultured hippocampal neurons<sup>47</sup>, a response time of similar magnitude, but slower  
341 than the GSPK response. In the Hh pathway, increases in full-length forms of Gli  
342 transcription factors within cilia were detected by immunofluorescence within 5  
343 minutes after addition of the Hh ligand to cells in culture<sup>48</sup>. In more recent reports,  
344 increases or decreases in ciliary levels of several other Hh pathway proteins, including  
345 soluble and transmembrane proteins, were detected ~15 minutes after addition of the  
346 Hh ligand<sup>49,50</sup>.

347

348 One important difference between the GSPK and  $\beta$ -arrestin 2 responses and the Hh  
349 pathway response is that the first two depend on a signal sent from the cilium to the  
350 cell body, whereas the initial Hh pathway responses do not require communication  
351 between the cilium and the cell body but occur entirely within the cilium<sup>16</sup>. In the Hh  
352 pathway, Smo and the full-length Gli proteins are thought to move into and out of the  
353 cilium constitutively<sup>48,51,52</sup>. Through multiple, complex, and still emerging mechanisms,  
354 Hh binding to Patched activates Smoothed in the cilium, leading to Smoothed  
355 retention and consequent intraciliary alterations of Gli properties<sup>12,52-55</sup>. The Hh-  
356 dependent changes in cell proliferation that are the ultimate outcome of Hh pathway  
357 activation occur relatively much later<sup>56</sup>.

358

359 Our results indicate that ciliary adhesion indeed generates a signal that is sent to the  
360 cell body to elicit the large increase in cellular cAMP. That signal leads to  
361 phosphorylation of GSPK, and GSPK is required for the cAMP increase; but the failure  
362 of db-cAMP to induce GSPK phosphorylation indicates that the signal from the cilia is  
363 not cAMP, as been earlier suggested<sup>24</sup>, and thus the signal remains unknown.  
364 Similarly, the rapid movement of  $\beta$ -arrestin from the cytoplasm to the cilia upon

365 activation of the somatostatin receptor 3 (SSTR3) is proposed to be a response to an  
366 undefined signal from the cilium<sup>47</sup>.

367

368 Another consideration also argues against the notion that cAMP from  
369 *Chlamydomonas* cilia triggers the responses in the cell body. In addition to their critical  
370 signaling role in sexual reproduction, the two cilia drive motility. Under the control of  
371 cues from light shining on the channelrhodopsin-containing eyespots in cells, the  
372 beating of the two cilia can be differentially controlled to allow the cells to swim toward  
373 or away from the light and find favorable environments for photosynthetic growth.  
374 Although photoreceptor currents that regulate calcium concentrations are the primary  
375 controller of motility<sup>57</sup>, cAMP also plays a role<sup>58</sup>. Our results that GSPK responds to  
376 non-cAMP-mediated signals from the cilia provides a solution to the potential problem  
377 that changes in light intensity experienced by gametes would activate them for cell  
378 fusion in the absence of a partner.

379

380 Results from a *Chlamydomonas* mutant with a phenotype similar to the *gspk* mutant  
381 raise ideas about the nature of the undefined ciliary signal. Gametes of the *imp-3*  
382 mutant which have a lesion in the PP2A3 phosphatase<sup>59</sup>, also undergo normal ciliary  
383 adhesion, but adhesion fails to increase cAMP and fusion is strongly impaired. The  
384 substrates for PP2A3 are unknown, but earlier work on *imp-3* mutant gametes  
385 suggested that this phosphatase functioned in the cilia, not the cell body<sup>60</sup>. Consistent  
386 with this earlier observation, immunofluorescence studies showed that PP2A3 was  
387 enriched in the proximal part of the cilia, just distal to the transition zone and some  
388 was also localized in the cell body<sup>59</sup>. One scenario for adhesion-induced gamete  
389 activation would be that SAG1-SAD1 interactions somehow modify ciliary PP2A3,  
390 which then moves to the cytoplasm to carry out its function, which could include  
391 changing the phosphorylation state of proteins that regulate GSPK properties. Future  
392 experiments with gametes bearing combinations of *WT* and mutant forms of GSPK  
393 and PP2A3 should provide new insights into the nature of the signal transmitted from  
394 the cilia.

395

396 We should note that because of the rapid kinetics of the responses of *Chlamydomonas*  
397 gametes to ciliary adhesion, we cannot rule out the possibility that this signaling

398 system is similar to those of cilium-based olfaction and vision and depends on changes  
399 in membrane potential. Indeed, *Chlamydomonas* possesses a gene,  
400 ADCY1/Cre06.g300500, that encodes an unusual chimeric protein with a predicted N-  
401 terminal channel-like domain and a C-terminal adenylyl cyclase domain. Moreover,  
402 our gamete transcriptome results<sup>43</sup> showed that ADCY1 transcripts are gamete-  
403 specific and upregulated during gamete activation. ADCY1 homologs are present in  
404 ciliated protozoa where they regulate motility<sup>61,62</sup>.

405

406 A possible clue about mechanisms for movement of a signal from the cilium to the cell  
407 body comes from earlier work on the role of IFT in ciliary signaling in *Chlamydomonas*.  
408 Studies with gametes of the *fla10* temperature-sensitive mutant of the anterograde IFT  
409 motor kinesin-2 (FLA10) showed that *Chlamydomonas* gametes whose cilia were  
410 transiently depleted of their IFT machinery exhibited a ciliary signaling phenotype  
411 identical to the *gspk* phenotype<sup>33,34</sup>. At 45 minutes after *fla10* gametes were  
412 transferred to the non-permissive temperature, IFT components were depleted from  
413 the cilia, but the cilia remained essentially full-length and were undiminished in their  
414 ability to undergo ciliary adhesion. Importantly, though, ciliary adhesion failed to  
415 induce the typical increase in cAMP and failed to induce gamete activation and cell  
416 fusion. As with the *gspk* mutants, gamete activation was rescued by addition of db-  
417 cAMP. Thus, the signal for GSPK responses could be carried by retrograde IFT from  
418 the cilia to the cytoplasm. It will be interesting to determine whether IFT is also required  
419 for the SSTR3 and other GPCR responses in vertebrates. Unfortunately, the inability  
420 to conditionally deplete vertebrate cilia of their IFT machinery makes such experiments  
421 challenging. Conventional mutations in IFT proteins block ciliogenesis and conditional  
422 IFT mutants are only just becoming available<sup>63</sup>.

423

424 Notably, not only is the cilium-to-cytoplasm signal in the somatostatin pathway  
425 undefined, but (with the exceptions of odorant receptors, rhodopsin, and smoothed),  
426 the cellular and molecular mechanisms that link ligand binding by the multitude of other  
427 vertebrate ciliary GPCRs to responses in the cytoplasm remain largely unknown.  
428 Current models are that cAMP from the cilium diffuses into the cytoplasm to regulate  
429 effectors in the cytoplasm. But, whether cilium generated-cAMP that diffuses into the

430 cytoplasm indeed is the signal is uncertain, and the localization and trafficking of  
431 effectors are still in early stages of investigation.

432

433 Our findings now set the stage for learning more about mechanisms of receptor-  
434 mediated cilium-to-cytoplasm communication. It will be important to learn whether, as  
435 we expect, the adhesion-induced phosphorylation of GSPK is essential for its function  
436 during gamete activation, and whether its protein kinase activity is required to induce  
437 the increase in cellular cAMP through as yet unidentified adenylyl cyclases or  
438 phosphodiesterases. Perhaps of even more importance, though, will be to use this  
439 system to investigate the undefined signal transmitted from the cilium to the cytoplasm  
440 and the mechanism of its transport.

441

442

#### 443 **Acknowledgments**

444 We are grateful to Dr. Caren Chang, University of Maryland, College Park, MD, USA  
445 for insightful discussions. We thank our laboratory colleagues, Drs. Jennifer Pinello  
446 and Jun Zhang for their constructive insights. We acknowledge the Imaging Core  
447 Facility in the department of Cell Biology and Molecular Genetics at the University of  
448 Maryland, College Park for Leica TCS SP5 confocal microscope. This work was  
449 supported by National Institutes of Health Grant GM122565 to W. J. S.

450

#### 451 **Author Contributions**

452 Conceptualization: M.A., P.R., W.J.S. Investigation: M.A., P.R., W.J.S. Methodology:  
453 M.A., P.R., P.H., S.K., W.J.S. Resources: M.A., P.R., P.H., S.K., W.J.S. Writing: , M.A.,  
454 P.R., S.K., W.J.S. Reviewing: M.A., P.R., S.K., P.H., W.J.S.

455

#### 456 **Declaration of Interests**

457 The authors declare no competing interests.

458

459

460

#### 461 **Methods**

462



## 463 **Contact for Reagent and Resource Sharing**

464 Requests for further information or resources and reagents should be directed to and  
465 will be fulfilled by the Lead Contact, William J. Snell (wsnell1@umd.edu).

466

## 467 **Cells and cell culture**

468 *Chlamydomonas reinhardtii* wild type strains 21gr (mating type *plus*; mt+; CC-1690;  
469 designated WT(+), CMJ030 (mating type *minus*; mt-; CC-5325; designated WT(-),  
470 *hap2* (40D4; CC5281) and SAG1-HA strains used in this study were grown in liquid  
471 tris-acetate phosphate medium (TAP) medium containing trace metals) at 22°C with  
472 aeration, or on the TAP plates with 1.5% agar<sup>36</sup>. The *Chlamydomonas* CLiP library  
473 mutants were obtained from the *Chlamydomonas* Resource Center. These mutants  
474 were generated by the insertion of a DNA cassette (CIB1) conferring resistance to  
475 paromomycin into the *Chlamydomonas* strain CMJ030<sup>64</sup>. Upon receipt, each mutant  
476 was streaked to single colonies, genomic DNA was isolated using Clontech plant  
477 genomic DNA isolation reagent (Takara, Cat. No. 9194), and the insertion site of the  
478 CIB1 cassette was verified by PCR. The PCR primers used to confirm the insertions  
479 are listed in Supplementary Table 1.

480

481

## 482 **Plasmid construction and transformation into *Chlamydomonas***

483 To prepare a plasmid containing an HA-tagged *GSPK* gene, a gene fragment of  
484 8780/8769 bp that included the full-length *GSPK* gene sequence (7272 bp) and an  
485 additional 850 bp 5' to the annotated transcription start site predicted to include the  
486 endogenous promoter and an additional 647 bp 3' to the stop codon was amplified  
487 from DNA of BAC clone 34G21 by PCR using primers possessing *Xho1* and *Not1*  
488 restriction sites at the 5' and 3' ends, respectively. The amplified PCR product was  
489 cloned into a paromomycin resistance vector, *pChlamiRNA3int* (obtained from the  
490 *Chlamydomonas* Resource Center) in between *Xho1* and *Not1* restriction sites by In-  
491 fusion HD EcoDry cloning plus kit (Takara, Cat. No. 638915). A gene fragment  
492 encoding three copies of the 9-amino-acid HA epitope followed by *EcoR1* and *XbaI*  
493 restriction sites was inserted using QuikChange II XL Site-Directed Mutagenesis Kit  
494 (Agilent technologies). The resulting *GSPK-HA* transgene plasmid (13,468 bp)  
495 containing the paromomycin resistance gene was verified by sequencing. For

496 *Chlamydomonas* transformation, *pGSPK-HA* was linearized with *BspH1* and the  
497 purified, linear plasmid was electroporated into *21gr* mt+ and CC-5325 mt-  
498 *Chlamydomonas* strains<sup>65</sup>. Transformants that grew on TAP plates containing  
499 paromomycin (Sigma, Cat. # P5057) were picked into 96-well plates and screened  
500 for the presence of *GSPK-HA* by PCR using primers listed in Supplementary Table 1.  
501 PCR-positive transformants were screened for *GSPK-HA* expression by  
502 immunoblotting with an anti-HA antibody.

503

#### 504 **Gametogenesis, gamete activation, cell adhesion, and gamete fusion**

505 Gametogenesis was induced by transferring vegetatively growing cells from TAP  
506 medium into N-free medium followed by growth under continuous light with aeration  
507 or agitation overnight. For gamete activation experiments, *plus* and *minus* gametes  
508 were mixed together or gametes of single mating types were experimentally activated  
509 by incubation in N-free medium containing 15 mM db-cAMP and 150  $\mu$ M papaverine  
510 (db-cAMP buffer) for ~10 minutes or more<sup>22</sup>. Cell-cell adhesion was quantified using  
511 an electronic particle counter (Coulter, Palo Alto, CA) as described previously<sup>39,66</sup>.  
512 Assays for cell wall loss and gamete fusion were as described previously<sup>44,67</sup>.

513

#### 514 **Cell fractionation, cilia isolation, and assaying PKG phosphorylation**

515 Fractionation of the cells into cell bodies and cilia from naive and adhering gametes  
516 was carried out as described earlier<sup>36</sup>. Phosphorylation of PKG was assayed in vitro  
517 as described earlier<sup>36</sup> using a protein tyrosine kinase (PTK) assay. 20  $\mu$ l of whole cilia  
518 (~3  $\mu$ g/ $\mu$ l protein) in 5% sucrose, 20 mM HEPES buffer were mixed with 20  $\mu$ l of 2X  
519 PTK buffer (20 mM HEPES, pH 7.2, 10 mM MgCl<sub>2</sub>, 2 mM dithiothreitol, 1 mM EDTA,  
520 50 mM KCl, 2 mM ATP, 0.2% Nonidet P-40, 0.4 mM orthovanadate, 20 mM  $\beta$ -  
521 glycerolphosphate, and 2% Sigma plant protease inhibitor cocktail) in the presence of  
522 ATP for 10 minutes and the phosphorylated form of PKG was detected by use of 4-  
523 20% gradient SDS-PAGE gels and immunoblotting using anti-phospho-tyrosine (anti-  
524 p-Tyr) antibody (Sigma, Cat. # 05-321).

525

#### 526 **GSPK phosphorylation and $\lambda$ -phosphatase treatment**

527 GSPK phosphorylation in lysates of naive, adhering, or db-cAMP-activated gametes

528 was assed by changes in migration in immunoblots. The reactions were stopped by  
529 addition of aliquots to 4xSDS sample buffer followed by immediate boiling. For  
530 phosphatase treatment, the lysates was prepared by brief sonication of  $2 \times 10^7$  cells/ml  
531 in 1 ml in HEMDK buffer. The 40  $\mu$ l final reaction volume contained 31  $\mu$ l cell lysate,  
532 1  $\mu$ l  $\lambda$ -phosphatase (NEB, 400,000 U/ $\mu$ l), and 8  $\mu$ l of phosphatase reaction buffer  
533 (NEB). After incubation at 30°C for 30 minutes, reactions were terminated by adding  
534 40  $\mu$ l of 4 x SDS sample buffer followed by boiling. As controls, samples were  
535 incubated in the presence of a phosphatase inhibitor cocktail (Sigma Cat. No. P2850).

536

### 537 **cAMP ELISA assay**

538 cAMP levels in adhering wildtype and *GSPK* mutant gametes were quantified by use  
539 of a cAMP Elisa kit (Enzo Life Sciences, #ADI-900-163). Equal numbers (100  $\mu$ l,  $2 \times 10^7$   
540 cells/ml in M-N) of the *WT* and *gspk plus* and *minus* gametes were separately mixed  
541 in 1.5 ml Eppendorf tubes to initiate ciliary adhesion, and at the times indicated the  
542 cells were harvested by centrifugation (6350 x g; 4°C) and flash-frozen in liquid  
543 nitrogen. For the assay, samples were resuspended in 100  $\mu$ l of 0.1 M HCl and  
544 incubated at room temperature for 10 minutes followed by clarification by  
545 centrifugation (20000 x g; 4°C). Supernatants were transferred to fresh tubes for use  
546 in the assay, which was performed using the acetylation protocol according to the  
547 manufacturer's instructions. Absorbance at 405 nm of standards and experimental  
548 samples were determined using a microplate reader (LabSystems-Multiskan Ascent  
549 354 Microplate Reader, San Diego, CA, USA). Results shown are from 6 independent  
550 experiments and are plotted as pmol/ml cAMP produced in the *WT* and *gspk* mutant  
551 mixtures.

552

### 553 **Determination of mating structure activation.**

554 As described previously<sup>68</sup>, samples (~200  $\mu$ l,  $5 \times 10^6$  cells/ ml) in N-free medium were  
555 seeded on cover slips coated with poly-L-lysine (Sigma, Cat. No. P8920) for 5 minutes  
556 followed by fixation with 4% paraformaldehyde solution (Sigma, Cat. No. 158127)  
557 freshly made in 10 mM HEPES, pH 7.4. Coverslips were washed with 1x PBS for 3  
558 minutes, immersed for 6 minutes in 80% acetone (Fischer Scientific, Cat. No. 67-64-  
559 1), 30 mM NaCl, and 2 mM sodium phosphate buffer, pH 7.0, at -20°C, followed by

560 immersion in 100% acetone at  $-20^{\circ}\text{C}$  for 6 minutes. Samples were then stained with  
561 Alexa 488 Phalloidin (ThermoFisher Scientific, Cat. No. A12379) for 15 minutes in the  
562 dark<sup>69</sup>. Phalloidin incubation was followed by a wash in 1x PBS for 5 minutes. Finally,  
563 coverslips were mounted on slides using antifading agent Fluoromount-G™  
564 (ThermoFisher Scientific, Cat. No. 00-4959-02) and examined by Hyd detector-  
565 equipped Leica TCS SP5 confocal microscope using a 1.4 numerical aperture, 63 X  
566 oil immersion objective. Images obtained from z series were summed to produce a  
567 projected image using Leica LAS X, and cropped in the Illustrator program of Adobe  
568 Systems (USA).

569

### 570 **Protein Determination, SDS PAGE and Immunoblotting**

571 Protein concentrations were determined by use of the Bradford assay (Bio-Rad protein  
572 assay kit II, Cat. No. 5000002). For immunoblotting, samples were separated by SDS-  
573 PAGE on 4–20% Tris-Glycine or SDS-MOPS gradient gels (GenScript, USA) and  
574 transferred onto PVDF membranes (Merck Millipore, Cat. No. IPVH00010) as  
575 described previously<sup>34,40</sup>. Membranes were blocked by incubation in 3% fat-free dried  
576 milk (Carnation, Nestle, Inc., Solon, OH) for 1 hour followed by 1 hour of incubation in  
577 the primary antibody. Membranes were washed three times for 10 minutes with TBST  
578 (Tris-buffered saline, 0.1% Tween 20) followed by incubation with secondary antibody.  
579 After three consecutive washes with TBST and incubation in the chemiluminescent  
580 substrate, fluorescence signals were captured on a C-Digit blot scanner (LI-COR  
581 Instruments, USA). The antibodies used for immunoblotting were rat anti-HA (1:3000;  
582 Roche), mouse anti- $\alpha$ -tubulin (1:5000; Sigma) and goat anti-rat IgG HRP(1:5000;  
583 Merck); and goat anti-mouse IgG HRP (1:5000; Sigma).

584

### 585 **Bioinformatic Analysis, Quantification and Statistical Analysis**

586 For comparative analysis the homologous protein sequences were aligned with  
587 ClustalW, and the percentage of positions with identical or identical plus similar amino  
588 acid positions were calculated using the BioEdit 7.2 software  
589 (<https://bioedit.software.informer.com/7.2/>) software with a threshold of 75%. JPred4  
590 was used to predict secondary structure<sup>70</sup>. N-terminal myristoylation (N-myristoylation)  
591 sites were predicted using NMT - The MYR Predictor  
592 (<http://mendel.imp.ac.at/myristate/SUPLpredictor.htm>). All quantitative data represent

593 at least three independent sets of experiments. Statistical significance of differences  
594 between groups was assessed by Student's t-test. Data were analyzed using  
595 GraphPad Prism 9 (GraphPad Software, U.S.A.).

596

597

598 **References:**

599

600

601 1 Mykytyn, K. & Askwith, C. G-Protein-Coupled Receptor Signaling in Cilia. *Cold*  
602 *Spring Harb Perspect Biol* **9**, doi:10.1101/cshperspect.a028183 (2017).

603 2 Singla, V. & Reiter, J. F. The primary cilium as the cell's antenna: signaling at  
604 a sensory organelle. *Science* **313**, 629-633, doi:10.1126/science.1124534  
605 (2006).

606 3 Hildebrandt, F., Benzing, T. & Katsanis, N. Ciliopathies. *N Engl J Med.* **364**,  
607 1533-1543, doi:10.1056/NEJMra1010172 (2011).

608 4 Dell'Orco, D., Koch, K. W. & Rispoli, G. Where vision begins. *Pflugers Arch*  
609 **473**, 1333-1337, doi:10.1007/s00424-021-02605-3 (2021).

610 5 Nakamura, T. Cellular and molecular constituents of olfactory sensation in  
611 vertebrates. *Comp Biochem Physiol A Mol Integr Physiol* **126**, 17-32,  
612 doi:10.1016/s1095-6433(00)00191-4 (2000).

613 6 Dwyer, N. D., Troemel, E. R., Sengupta, P. & Bargmann, C. I. Odorant receptor  
614 localization to olfactory cilia is mediated by ODR-4, a novel membrane-  
615 associated protein. *Cell* **93**, 455-466, doi:10.1016/s0092-8674(00)81173-3  
616 (1998).

617 7 Christensen, S. T., Morthorst, S. K., Mogensen, J. B. & Pedersen, L. B. Primary  
618 Cilia and Coordination of Receptor Tyrosine Kinase (RTK) and Transforming  
619 Growth Factor beta (TGF-beta) Signaling. *Cold Spring Harb Perspect Biol* **9**,  
620 doi:10.1101/cshperspect.a028167 (2017).

621 8 Wu, C. T. *et al.* Discovery of ciliary G protein-coupled receptors regulating  
622 pancreatic islet insulin and glucagon secretion. *Genes Dev*,  
623 doi:10.1101/gad.348261.121 (2021).

624 9 Huangfu, D. *et al.* Hedgehog signalling in the mouse requires intraflagellar  
625 transport proteins. *Nature* **426**, 83-87, doi:10.1038/nature02061 (2003).

- 626 10 Pazour, G. J., Quarmby, L., Smith, A. O., Desai, P. B. & Schmidts, M. Cilia in  
627 cystic kidney and other diseases. *Cell Signal* **69**, 109519,  
628 doi:10.1016/j.cellsig.2019.109519 (2020).
- 629 11 Ma, M. Cilia and polycystic kidney disease. *Semin Cell Dev Biol* **110**, 139-148,  
630 doi:10.1016/j.semcdb.2020.05.003 (2021).
- 631 12 Nachury, M. V. The molecular machines that traffic signaling receptors into and  
632 out of cilia. *Curr Opin Cell Biol* **51**, 124-131, doi:10.1016/j.ceb.2018.03.004  
633 (2018).
- 634 13 Garcia, G., 3rd, Raleigh, D. R. & Reiter, J. F. How the Ciliary Membrane Is  
635 Organized Inside-Out to Communicate Outside-In. *Curr Biol* **28**, R421-R434,  
636 doi:10.1016/j.cub.2018.03.010 (2018).
- 637 14 Hu, Q. *et al.* A septin diffusion barrier at the base of the primary cilium maintains  
638 ciliary membrane protein distribution. *Science* **329**, 436-439,  
639 doi:10.1126/science.1191054 (2010).
- 640 15 Dhallan, R. S., Yau, K. W., Schrader, K. A. & Reed, R. R. Primary structure and  
641 functional expression of a cyclic nucleotide-activated channel from olfactory  
642 neurons. *Nature* **347**, 184-187, doi:10.1038/347184a0 (1990).
- 643 16 Truong, M. E. *et al.* Vertebrate cells differentially interpret ciliary and extraciliary  
644 cAMP. *Cell* **184**, 2911-2926 e2918, doi:10.1016/j.cell.2021.04.002 (2021).
- 645 17 Nachury, M. V. & Mick, D. U. Establishing and regulating the composition of  
646 cilia for signal transduction. *Nat Rev Mol Cell Biol* **20**, 389-405,  
647 doi:10.1038/s41580-019-0116-4 (2019).
- 648 18 Hilgendorf, K. I. *et al.* Omega-3 Fatty Acids Activate Ciliary FFAR4 to Control  
649 Adipogenesis. *Cell* **179**, 1289-1305 e1221, doi:10.1016/j.cell.2019.11.005  
650 (2019).
- 651 19 Saada, E. A. *et al.* Insect stage-specific receptor adenylate cyclases are  
652 localized to distinct subdomains of the *Trypanosoma brucei* Flagellar  
653 membrane. *Eukaryot Cell* **13**, 1064-1076, doi:10.1128/EC.00019-14 (2014).
- 654 20 Oberholzer, M., Saada, E. A. & Hill, K. L. Cyclic AMP Regulates Social Behavior  
655 in African Trypanosomes. *mBio* **6**, e01954-01914, doi:10.1128/mBio.01954-14  
656 (2015).



- 657 21 Kawano, M., Tominaga, T., Ishida, M. & Hori, M. Roles of Adenylate Cyclases  
658 in Ciliary Responses of *Paramecium* to Mechanical Stimulation. *J Eukaryot*  
659 *Microbiol* **67**, 532-540, doi:10.1111/jeu.12800 (2020).
- 660 22 Pasquale, S. M. & Goodenough, U. W. Cyclic AMP functions as a primary  
661 sexual signal in gametes of *Chlamydomonas reinhardtii*. *The Journal of cell*  
662 *biology* **105**, 2279-2292 (1987).
- 663 23 Pijst, H. L. A., van Driel, R., Janssens, P. M. W., Musgrave, A. & van den Ende,  
664 H. Cyclic AMP is involved in sexual reproduction of *Chlamydomonas*  
665 *eugametos*. *FEBS Letters* **174**, 132-136, doi:10.1016/0014-5793(84)81091-1  
666 (1984).
- 667 24 Saito, T., Small, L. & Goodenough, U. W. Activation of adenylyl cyclase in  
668 *Chlamydomonas reinhardtii* by adhesion and by heat. *J Cell Biol* **122**, 137-147,  
669 doi:10.1083/jcb.122.1.137 (1993).
- 670 25 Zhang, Y. H., Ross, E. M. & Snell, W. J. ATP-dependent regulation of flagellar  
671 adenylyl cyclase in gametes of *Chlamydomonas reinhardtii*. *J Biol Chem* **266**,  
672 22954-22959 (1991).
- 673 26 Zhang, Y. & Snell, W. J. Flagellar adhesion-dependent regulation of  
674 *Chlamydomonas* adenylyl cyclase in vitro: a possible role for protein kinases in  
675 sexual signaling. *J Cell Biol* **125**, 617-624, doi:10.1083/jcb.125.3.617 (1994).
- 676 27 Adair, W. S., Hwang, C. & Goodenough, U. W. Identification and visualization  
677 of the sexual agglutinin from the mating-type plus flagellar membrane of  
678 *Chlamydomonas*. *Cell* **33**, 183-193, doi:10.1016/0092-8674(83)90347-1  
679 (1983).
- 680 28 Ferris, P. J. *et al.* Plus and minus sexual agglutinins from *Chlamydomonas*  
681 *reinhardtii*. *Plant Cell* **17**, 597-615, doi:10.1105/tpc.104.028035 (2005).
- 682 29 Zhang, Y. & Snell, W. J. Differential regulation of adenylyl cyclases in vegetative  
683 and gametic flagella of *Chlamydomonas*. *J Biol Chem* **268**, 1786-1791 (1993).
- 684 30 Ranjan, P., Awasthi, M. & Snell, W. J. Transient Internalization and  
685 Microtubule-Dependent Trafficking of a Ciliary Signaling Receptor from the  
686 Plasma Membrane to the Cilium. *Curr Biol* **29**, 2942-2947 e2942,  
687 doi:10.1016/j.cub.2019.07.022 (2019).

- 688 31 Musgrave, A. *et al.* Evidence for a functional membrane barrier in the transition  
689 zone between the flagellum and cell body of *Chlamydomonas eugametos*  
690 gametes. *Planta* **167**, 544-553 (1986).
- 691 32 Hunnicutt, G. R., Kosfischer, M. G. & Snell, W. J. Cell body and flagellar  
692 agglutinins in *Chlamydomonas reinhardtii*: the cell body plasma membrane is a  
693 reservoir for agglutinins whose migration to the flagella is regulated by a  
694 functional barrier. *J Cell Biol* **111**, 1605-1616, doi:10.1083/jcb.111.4.1605  
695 (1990).
- 696 33 Pan, J. & Snell, W. J. Kinesin-II is required for flagellar sensory transduction  
697 during fertilization in *Chlamydomonas*. *Mol Biol Cell* **13**, 1417-1426,  
698 doi:10.1091/mbc.01-11-0531 (2002).
- 699 34 Belzile, O., Hernandez-Lara, C. I., Wang, Q. & Snell, W. J. Regulated  
700 membrane protein entry into flagella is facilitated by cytoplasmic microtubules  
701 and does not require IFT. *Curr Biol* **23**, 1460-1465,  
702 doi:10.1016/j.cub.2013.06.025 (2013).
- 703 35 Lehtreck, K. F. *et al.* Cycling of the signaling protein phospholipase D through  
704 cilia requires the BBSome only for the export phase. *J Cell Biol* **201**, 249-261,  
705 doi:10.1083/jcb.201207139 (2013).
- 706 36 Wang, Q. & Snell, W. J. Flagellar adhesion between mating type *plus* and  
707 mating type *minus* gametes activates a flagellar protein-tyrosine kinase during  
708 fertilization in *Chlamydomonas*. *J Biol Chem* **278**, 32936-32942,  
709 doi:10.1074/jbc.M303261200 (2003).
- 710 37 Wang, Q., Pan, J. & Snell, W. J. Intraflagellar Transport Particles Participate  
711 Directly in Cilium-Generated Signaling in *Chlamydomonas*. *Cell* **125**, 549-562,  
712 doi:10.1016/j.cell.2006.02.044 (2006).
- 713 38 Solter, K. M. & Gibor, A. Evidence for role of flagella as sensory transducers in  
714 mating of *Chlamydomonas reinhardtii*. *Nature* **265**, 444-445,  
715 doi:10.1038/265444a0 (1977).
- 716 39 Snell, W. J. & Moore, W. S. Aggregation-dependent turnover of flagellar  
717 adhesion molecules in *Chlamydomonas* gametes. *J Cell Biol* **84**, 203-210,  
718 doi:10.1083/jcb.84.1.203 (1980).

- 719 40 Cao, M. *et al.* Uni-directional ciliary membrane protein trafficking by a  
720 cytoplasmic retrograde IFT motor and ciliary ectosome shedding. *Elife*  
721 **4:e05242**, doi:10.7554/eLife.05242 (2015).
- 722 41 Goodenough, U. W. Cyclic AMP enhances the sexual agglutinability of  
723 *Chlamydomonas* flagella. *J Cell Biol* **109**, 247-252, doi:10.1083/jcb.109.1.247  
724 (1989).
- 725 42 Goodenough, U. W. & Weiss, R. L. Interrelationships between microtubules, a  
726 striated fiber, and the gametic mating structure of *Chlamydomonas reinhardtii*.  
727 *J Cell Biol* **76**, 430-438 (1978).
- 728 43 Ning, J. *et al.* Comparative genomics in *Chlamydomonas* and *Plasmodium*  
729 identifies an ancient nuclear envelope protein family essential for sexual  
730 reproduction in protists, fungi, plants, and vertebrates. *Genes Dev* **27**, 1198-  
731 1215, doi:10.1101/gad.212746.112 (2013).
- 732 44 Liu, Y. *et al.* The conserved plant sterility gene HAP2 functions after attachment  
733 of fusogenic membranes in *Chlamydomonas* and *Plasmodium* gametes. *Genes*  
734 *Dev* **22**, 1051-1068, doi:10.1101/gad.1656508 (2008).
- 735 45 Saito, T., Tsubo, Y. & Matsuda, Y. Synthesis and turnover of cell body  
736 agglutinin as a pool of flagellar surface agglutinin in *Chlamydomonas reinhardtii*  
737 gamete. *Archives of Microbiology* **142**, 207-210 (1985).
- 738 46 Paoli, M. *et al.* Neuronal Response Latencies Encode First Odor Identity  
739 Information across Subjects. *J Neurosci* **38**, 9240-9251,  
740 doi:10.1523/JNEUROSCI.0453-18.2018 (2018).
- 741 47 Green, J. A. *et al.* Recruitment of beta-Arrestin into Neuronal Cilia Modulates  
742 Somatostatin Receptor Subtype 3 Ciliary Localization. *Mol Cell Biol* **36**, 223-  
743 235, doi:10.1128/MCB.00765-15 (2016).
- 744 48 Wen, X. *et al.* Kinetics of hedgehog-dependent full-length Gli3 accumulation in  
745 primary cilia and subsequent degradation. *Mol Cell Biol* **30**, 1910-1922,  
746 doi:10.1128/MCB.01089-09 (2010).
- 747 49 Pal, K. *et al.* Smoothed determines beta-arrestin-mediated removal of the G  
748 protein-coupled receptor Gpr161 from the primary cilium. *J Cell Biol* **212**, 861-  
749 875, doi:10.1083/jcb.201506132 (2016).
- 750 50 May, E. A. *et al.* Time-resolved proteomics profiling of the ciliary Hedgehog  
751 response. *J Cell Biol* **220**, doi:10.1083/jcb.202007207 (2021).

- 752 51 Ye, F. *et al.* Single molecule imaging reveals a major role for diffusion in the  
753 exploration of ciliary space by signaling receptors. *Elife* **2**, e00654,  
754 doi:10.7554/eLife.00654 (2013).
- 755 52 Milenkovic, L., Scott, M. P. & Rohatgi, R. Lateral transport of Smoothed from  
756 the plasma membrane to the membrane of the cilium. *J Cell Biol* **187**, 365-374,  
757 doi:10.1083/jcb.200907126 (2009).
- 758 53 Petrov, K., Wierbowski, B. M., Liu, J. & Salic, A. Distinct Cation Gradients  
759 Power Cholesterol Transport at Different Key Points in the Hedgehog Signaling  
760 Pathway. *Dev Cell* **55**, 314-327 e317, doi:10.1016/j.devcel.2020.08.002 (2020).
- 761 54 Rohatgi, R., Milenkovic, L. & Scott, M. P. Patched1 regulates hedgehog  
762 signaling at the primary cilium. *Science* **317**, 372-376,  
763 doi:10.1126/science.1139740 (2007).
- 764 55 Zhang, Y. *et al.* Structural Basis for Cholesterol Transport-like Activity of the  
765 Hedgehog Receptor Patched. *Cell* **175**, 1352-1364 e1314,  
766 doi:10.1016/j.cell.2018.10.026 (2018).
- 767 56 Arveseth, C. D. *et al.* Smoothed transduces Hedgehog signals via activity-  
768 dependent sequestration of PKA catalytic subunits. *Plos Biol* **19**, e3001191,  
769 doi:10.1371/journal.pbio.3001191 (2021).
- 770 57 Harz, H. & Hegemann, P. Rhodopsin-regulated calcium currents in  
771 *Chlamydomonas*. *Nature* **351**, 489-491, doi:doi.org/10.1038/351489a0 (1991).
- 772 58 Saegusa, Y. & Yoshimura, K. cAMP controls the balance of the propulsive  
773 forces generated by the two flagella of *Chlamydomonas*. *Cytoskeleton*  
774 (*Hoboken*) **72**, 412-421, doi:10.1002/cm.21235 (2015).
- 775 59 Lin, H., Miller, M. L., Granas, D. M. & Dutcher, S. K. Whole genome sequencing  
776 identifies a deletion in protein phosphatase 2A that affects its stability and  
777 localization in *Chlamydomonas reinhardtii*. *PLoS Genet* **9**, e1003841,  
778 doi:10.1371/journal.pgen.1003841 (2013).
- 779 60 Kubo, T. *et al.* Characterization of novel genes induced by sexual adhesion and  
780 gamete fusion and of their transcriptional regulation in *Chlamydomonas*  
781 *reinhardtii*. *Plant Cell Physiol* **49**, 981-993, doi:10.1093/pcp/pcn076 (2008).
- 782 61 Naitoh, Y. & Eckert, R. Ionic mechanisms controlling behavioral responses of  
783 *Paramecium* to mechanical stimulation. *Science* **164**, 963-965,  
784 doi:10.1126/science.164.3882.963 (1969).

- 785 62 Weber, J. H. *et al.* Adenylyl cyclases from *Plasmodium*, *Paramecium* and  
786 *Tetrahymena* are novel ion channel/enzyme fusion proteins. *Cell Signal* **16**,  
787 115-125, doi:10.1016/s0898-6568(03)00129-3 (2004).
- 788 63 Engelke, M. F. *et al.* Acute Inhibition of Heterotrimeric Kinesin-2 Function  
789 Reveals Mechanisms of Intraflagellar Transport in Mammalian Cilia. *Curr Biol*  
790 **29**, 1137-1148 e1134, doi:10.1016/j.cub.2019.02.043 (2019).
- 791 64 Li, X. *et al.* A genome-wide algal mutant library and functional screen identifies  
792 genes required for eukaryotic photosynthesis. *Nature Genetics* **51**, 627-635,  
793 doi:10.1038/s41588-019-0370-6 (2019).
- 794 65 Shimogawara, K., Fujiwara, S., Grossman, A. & Usuda, H. High-efficiency  
795 transformation of *Chlamydomonas reinhardtii* by electroporation. *Genetics* **148**,  
796 1821-1828 (1998).
- 797 66 Snell, W. J. & Roseman, S. Kinetics of adhesion and de-adhesion of  
798 *Chlamydomonas* gametes. *J Biol Chem* **254**, 10820-10829 (1979).
- 799 67 Snell, W. J. Study of the release of cell wall degrading enzymes during  
800 adhesion of *Chlamydomonas* gametes. *Exp Cell Res* **138**, 109-119,  
801 doi:10.1016/0014-4827(82)90096-9 (1982).
- 802 68 Wilson, N. F., Foglesong, M. J. & Snell, W. J. The *Chlamydomonas* mating type  
803 plus fertilization tubule, a prototypic cell fusion organelle: isolation,  
804 characterization, and in vitro adhesion to mating type minus gametes. *J Cell*  
805 *Biol* **137**, 1537-1553, doi:10.1083/jcb.137.7.1537 (1997).
- 806 69 Craig, E. W. *et al.* The elusive actin cytoskeleton of a green alga expressing  
807 both conventional and divergent actins. *Mol Biol Cell* **30**, 2827-2837,  
808 doi:10.1091/mbc.E19-03-0141 (2019).
- 809 70 Drozdetskiy, A., Cole, C., Procter, J. & Barton, G. J. JPred4: a protein  
810 secondary structure prediction server. *Nucleic Acids Res* **43**, W389-394,  
811 doi:10.1093/nar/gkv332 (2015).

812

813 **Figures**



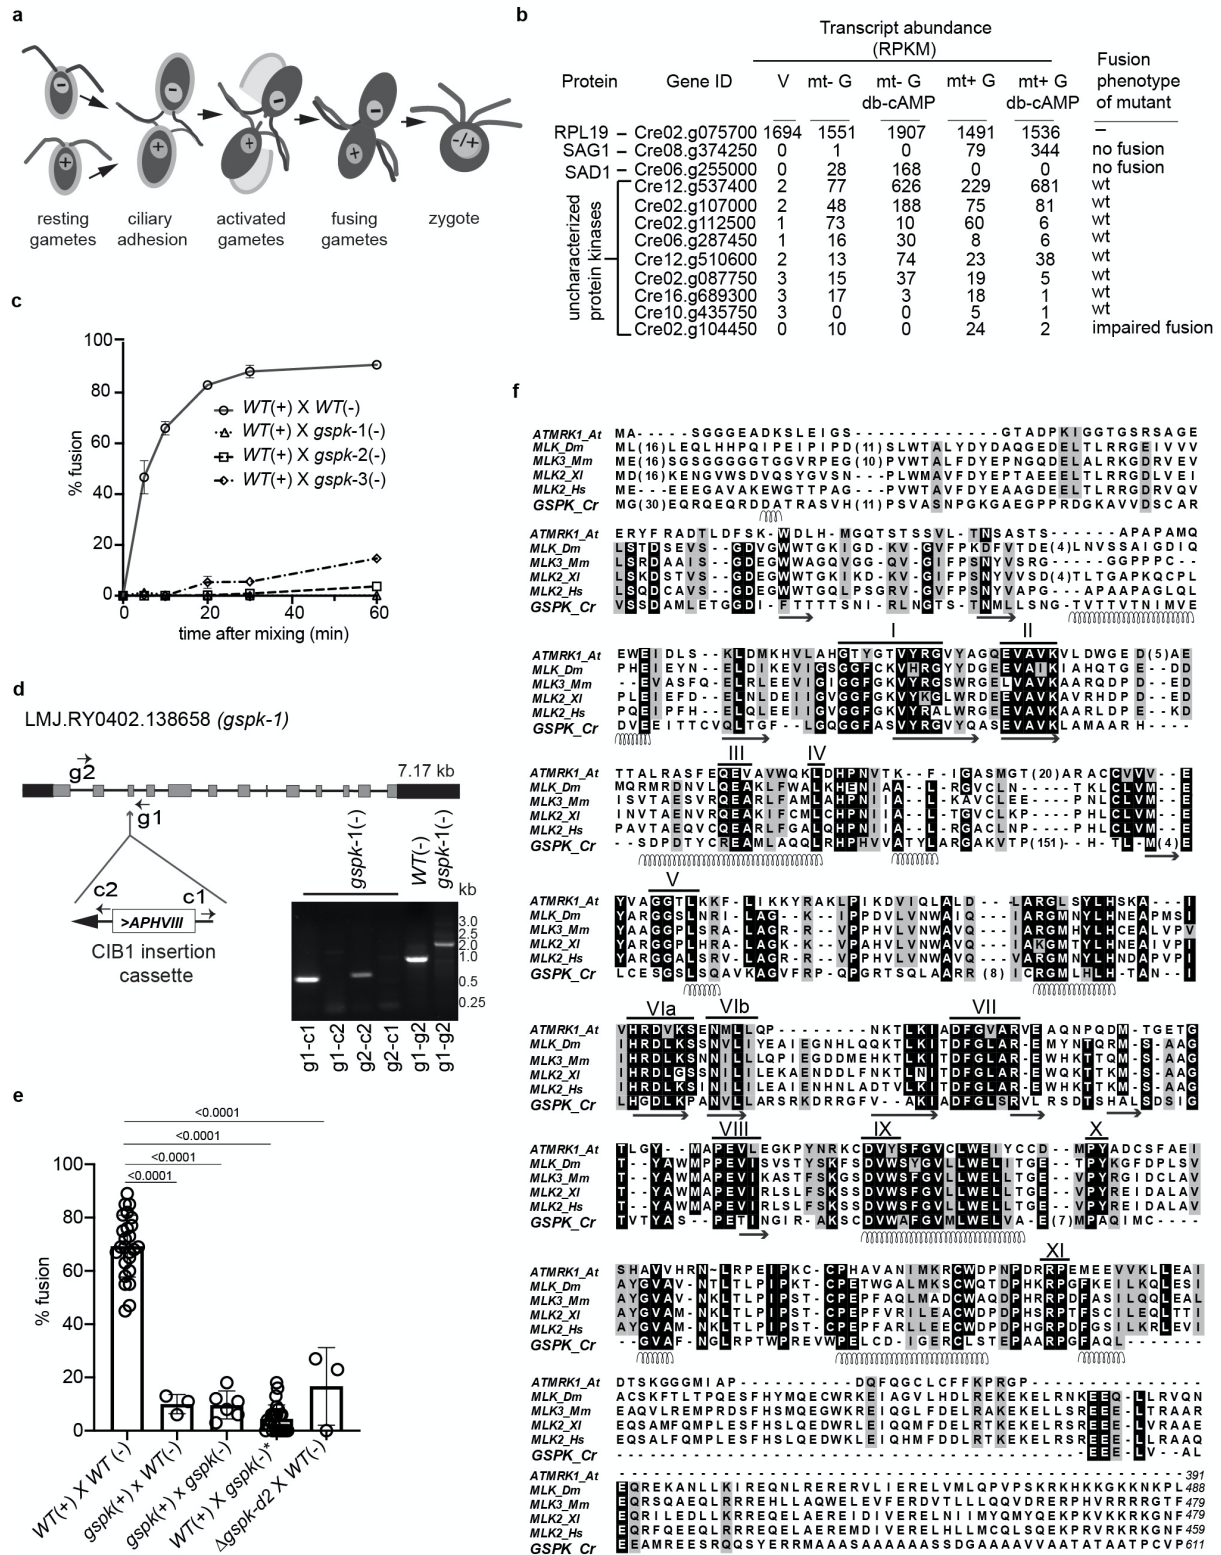

814  
815  
816  
817  
818  
819

**Figure 1. GSPK is a gamete-specific mixed lineage protein kinase essential for gamete fusion.** **a** Illustration of fertilization in *Chlamydomonas*. **b** The Cre02.g104450 mutant has a fusion phenotype. Transcript abundance for the indicated genes in



820 vegetative (V), naive *minus* (mt- G) and *plus* (mt+ G) gametes, and db-cAMP-  
821 activated *minus* (mt- G, db-cAMP) and *plus* (mt+ G, db-cAMP) gametes represented  
822 by median reads per kilobase per million mapped reads (RPKM) are from Ning et al.  
823 (2013). *RPL19* is a housekeeping gene. The right panel indicates the fusion  
824 phenotypes. **c** Fusion is impaired in multiple Cre02.g104450 mutant strains.  
825 Quantification of fusion of *WT*(+) gametes with *minus* gametes of *WT* and three  
826 different CLiP *gspk* mutants. Values are means (+/- standard deviation) from three  
827 replicates. **d** Structure of the *GSPK* genomic locus in the *gspk-1* CLiP mutant. Grey  
828 solid boxes indicate exons; thin lines, introns; UTRs are shown as black boxes. The  
829 CIB1 (*AphVIII*) insertion cassette is in the 3rd intron of *gspk* in the *gspk* allele of  
830 LMJ.RY0402.138658\_1 strain. Primer locations for genotyping are shown by arrows,  
831 where g1 and g2 are gene-specific primers and c1 and c2 are specific to the insertion  
832 cassette. Gel images show diagnostic genomic DNA PCR samples. Primer  
833 combinations used for PCR are indicated at the bottom of the lanes. **e** Quantification  
834 of fusion in *WT* gametes (n=25 experiments) compared with fusion in *gspk*(+) mutant  
835 progeny generated from a cross between *gspk*(-) and *WT*(+) (n=3); fusion of *gspk*(+)  
836 mutants mixed with *gspk*(-) (n=7); fusion of *gspk*\*(-) mutant progeny generated from a  
837 cross between *gspk*(+) and *WT*(-) (n=25); and fusion of CRISPR-generated  $\Delta$ *gspk*-  
838 *d2*(+) mutant mixed with *WT*(-) (n=3). P-values labelled above the groups compared  
839 are from Student's t-test. (F) Multiple sequence alignment of GSPK and protein  
840 kinases from *Arabidopsis thaliana* (BAA22079.1), *Drosophila melanogaster*  
841 (AAL08011.1), *Mus musculus* (AAF73281.1), *Xenopus leavis* (AAP46399.1), and  
842 *Homo sapiens* (CAA62351.1). Identical and similar residues are highlighted in black  
843 and grey, respectively. The conserved domains of the catalytic core are indicated by  
844 roman numerals. Regions with  $\alpha$ -helices (spirals) and  $\beta$ -sheets (arrows) predicted for  
845 GSPK by JPred4 are denoted below the sequences.

846

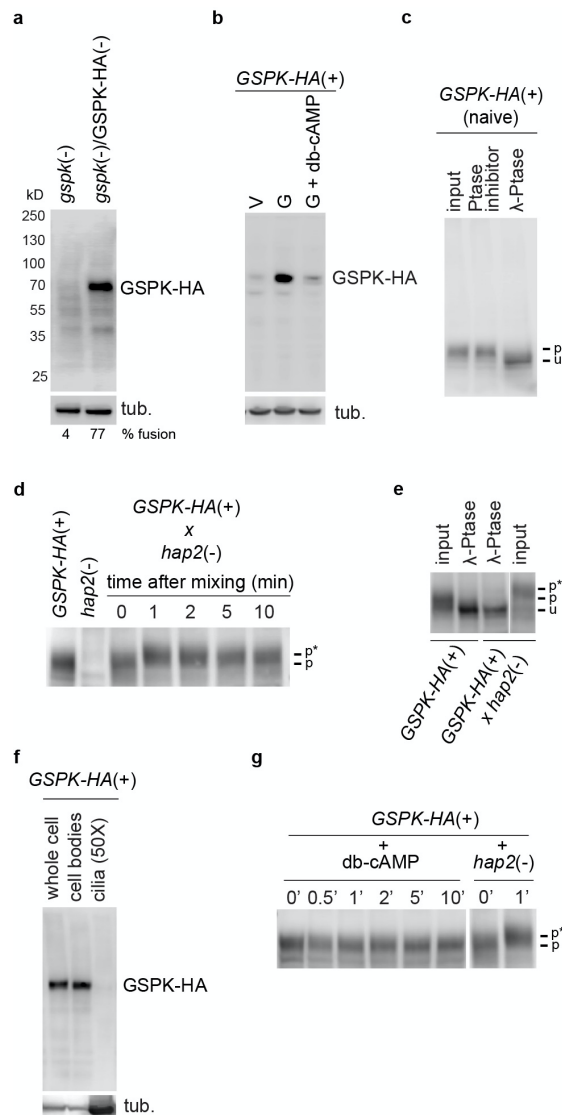

847

848

849

850 **Figure 2: GSPK is gamete-specific and phosphorylated within 1 minute after**

851 **ciliary adhesion is initiated.** **a** Expression of GSPK-HA in *gspk minus* gametes

852 rescues fusion. Anti-HA immunoblot of *gspk(-)* and *GSPK-HA*-rescued *gspk(-)*

853 gametes. Percent fusion at 10 minutes is shown below the blot. Tubulin was used as

854 a loading control. **b** GSPK-HA expression is gamete-specific and reduced upon

855 gamete activation by db-cAMP. Anti-HA immunoblot of *gspk/GSPK-HA(+)* vegetative

856 cells (V), naive gametes (G), and gametes activated by incubation in db-cAMP buffer

857 (G-A). **c** GSPK-HA is basally phosphorylated in naive gametes. Anti-HA immunoblot

858 of lysates of *gspk/GSPK-HA(+)* naive gametes that had been incubated with  $\lambda$ -

859 phosphatase in the presence and absence of a phosphatase inhibitor. **d-e** GSPK-HA

860 is phosphorylated within 1 minute after initiation of ciliary adhesion. Anti-HA  
 861 immunoblots of *GSPK-HA(+)* gametes at the indicated times after mixing with *hap2(-)*  
 862 gametes (d). Anti-HA immunoblot of lysates of *gspk/GSPK-HA(+)* gametes before and  
 863 10 minutes after mixing with *hap2(-)* gametes with and without treatment with  $\lambda$ -  
 864 phosphatase (e). Letters on the right indicate GSPK-HA that is unphosphorylated (u),  
 865 basally phosphorylated (p), or additionally phosphorylated (p\*). f GSPK fractionates  
 866 with cell bodies. Anti-HA immunoblot of whole cells, cell bodies, and cilia of  
 867 *gspk/GSPK-HA(+)* gametes. 3  $\mu$ g of protein were loaded per lane, which for cilia  
 868 represents about 50 cell equivalents. The lower panel is a tubulin loading control. g  
 869 Activation of gametes with db-cAMP buffer fails to induce phosphorylation of GSPK-  
 870 HA. Anti-HA immunoblot of *gspk/GSPK-HA(+)* gametes at the indicated times after  
 871 mixing with db-cAMP buffer. Cell wall loss was over 80% at 10 minutes, confirming  
 872 gamete activation.  
 873

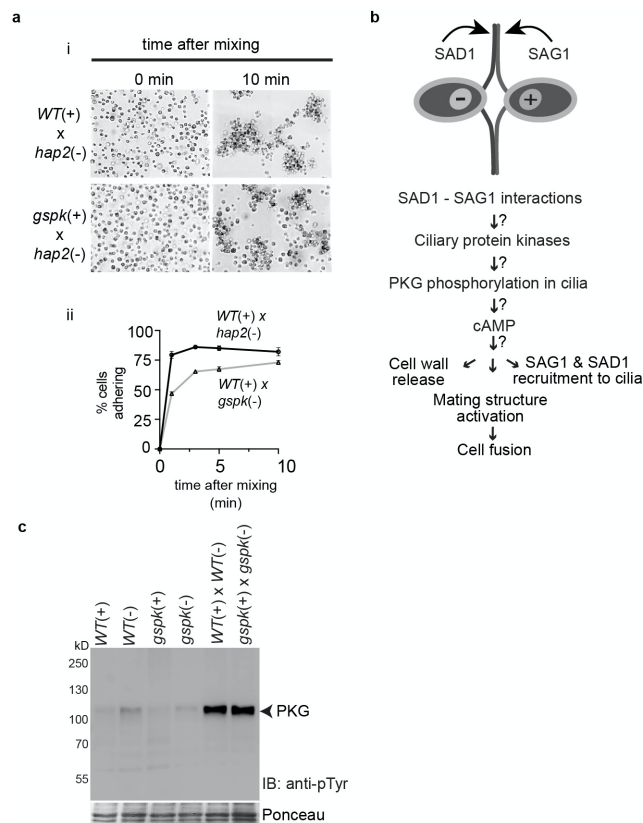

874

875

876 **Figure 3: *gspk* mutants undergo ciliary adhesion and phosphorylation of PKG**

877 **in cilia similarly to WT. a *gspk(+)* gametes undergo normal ciliary adhesion. ai**

878 Differential Interference Contrast (DIC) micrographs of *WT*(+) gametes (upper panel)  
 879 and *gspk*(+) gametes (lower panel) at the times indicated after mixing with *hap2*(-)  
 880 gametes. **aii** Quantification of adhesion in the indicated samples by use of an  
 881 electronic particle counter. **b** Schematic diagram of cilium-generated signaling  
 882 pathway in *Chlamydomonas*. **c** Ciliary adhesion in *gspk* gametes induces  
 883 phosphorylation of cGMP-dependent protein kinase (PKG). Anti-p-Tyr immunoblots  
 884 from PTK assay of cilia isolated from non-adhering *WT*(+), *WT*(-), *gspk*(+) and *gspk*(-)  
 885 gametes and from *WT*(+) gametes mixed with *WT*(-) gametes and *gspk*(+) gametes  
 886 mixed with *gspk*(-) gametes.  
 887  
 888

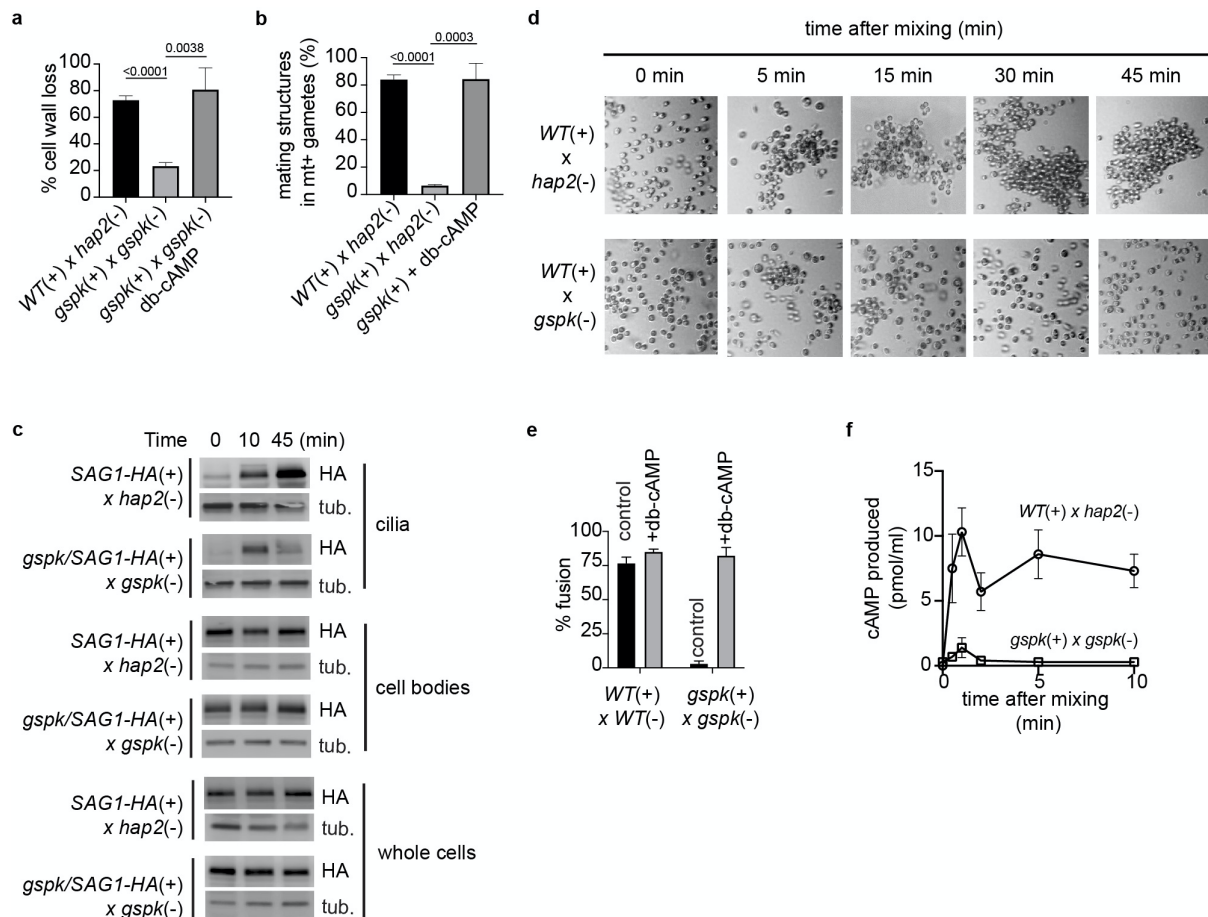

889

890

891

892 **Figure 4: Ciliary adhesion-induced cell body responses are impaired in *gspk***  
 893 **mutants and restored by treatment with db-cAMP, and ciliary adhesion fails to**  
 894 **trigger increases in cAMP in the mutants. a-b *gspk* gametes are impaired in cell**

895 wall loss and mating structure activation. Quantification of cell wall loss at 10 minutes  
 896 after mixing *WT(+)* and *hap2(-)* gametes and *gspk(+)* and *gspk(-)* gametes in the  
 897 absence and presence of db-cAMP buffer (**a**). Quantification of mating structure  
 898 formation in mixtures of *WT(+)* and *hap2(-)* gametes and *gspk(+)* and *gspk(-)* gametes  
 899 at 10 minutes after mixing and in samples of *gspk(+)* gametes that had been incubated  
 900 with db-cAMP buffer for 30 minutes (**b**). **c** Ciliary adhesion-induced movement of  
 901 SAG1-HA from the cell plasma membrane to the ciliary membrane is impaired in  
 902 *gspk(+)* gametes. Anti-HA immunoblots of whole cells, cell bodies, and cilia from the  
 903 indicated samples harvested 0, 10 and 45 minutes after SAG1-HA-expressing *WT* and  
 904 *gspk(+)* gametes were separately mixed with *gspk(-)* gametes. The lower panel is a  
 905 tubulin loading control. 3 µg protein were loaded in each lane. **d** *gspk* gametes fail to  
 906 undergo sustained ciliary adhesion. Bright field micrographs of samples taken at the  
 907 indicated times after mixing *WT(+)* gametes with *hap2(-)* gametes and *WT(+)* gametes  
 908 with *gspk(-)* gametes. **e** Fusion in *gspk* gametes is rescued by db-cAMP.  
 909 Quantification of fusion in mixtures of *WT plus* and *minus* gametes and *gspk plus* and  
 910 *minus* gametes treated with or without db-cAMP. **f** The ciliary adhesion-induced  
 911 increase in cAMP is impaired in *gspk* gametes. cAMP concentrations were determined  
 912 by use of an ELISA-based method at the indicated times after mixing wild-type *plus*  
 913 and *minus* gametes and *gspk plus* and *minus* gametes. P-values shown for A and B  
 914 are from comparisons of means by Student's t-test.

915

## 916 Supplementary information

917

918

| CLiP mutants for Cre02.g104450 |                      |                      |                      |
|--------------------------------|----------------------|----------------------|----------------------|
|                                | LMJ.RY0402.138658    | LMJ.RY0402.097798    | LMJ.RY0402.039382    |
| Primers                        |                      |                      |                      |
| g1                             | GCACATAAGGTAGGGCGTGT | GTAATCAAGCTCCCTGCCA  | ACCAACAGGAGAATATGGCG |
| g2                             | TTGCTTATATGCTTGCGTGC | GCTGCCTCATTACCTCTTGC | GGGTGATGTCATTAATCGGG |
| c1                             | GCACCAATCATGTCAAGCCT | GCACCAATCATGTCAAGCCT | GCACCAATCATGTCAAGCCT |
| c2                             | GACGTTACAGCACACCCTTG | GACGTTACAGCACACCCTTG | GACGTTACAGCACACCCTTG |

919

920 **Supplementary Table 1: *AphVII* cassette and gene-specific primers used for CLiP**  
 921 mutant analysis.

922

923

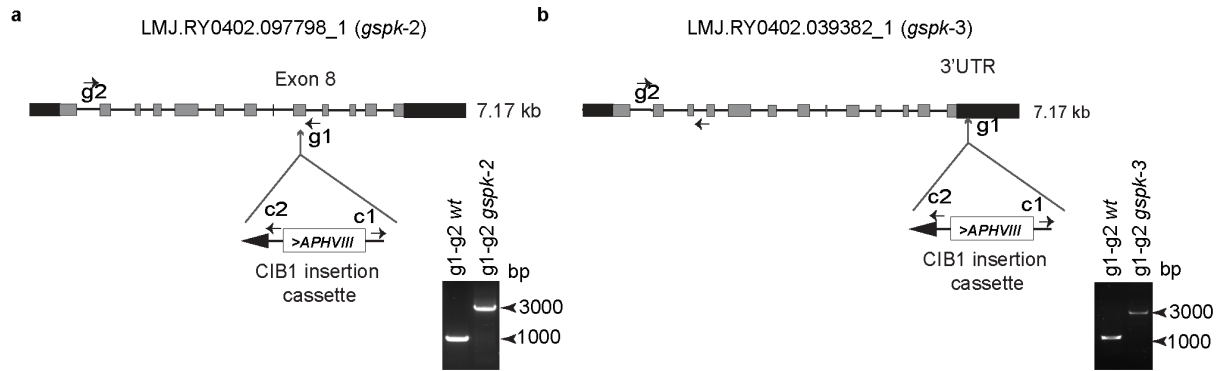

924

925

926

927

928 **Supplementary Fig. 1: Structure of the *GSPK* genomic locus in CLiP library**  
 929 **mutants.**

930 **a-b.** Grey solid boxes indicate exons; thin lines indicate introns; UTRs are shown as  
 931 black boxes. The CIB1 (*AphVIII*) insertion cassette is located in the 8th intron of *gspk*  
 932 in the *gspk* allele of LMJ.RY0402.097798\_1 strain; *gspk-2* (a) and in the 3'UTR of *gspk*  
 933 in the *gspk* allele of LMJ.RY0402.039382\_1 strain; *gspk-3* (b). Primer locations for  
 934 genotyping are shown by arrows where g1 and g2 are gene-specific primers and c1  
 935 and c2 are the primers specific to the insertion cassette. Gel images show the  
 936 diagnostic genomic DNA PCR gels. The primer combinations used for PCR are  
 937 indicated above the lanes. The PCR product of ~1000 bp in the *WT Chlamydomonas*  
 938 strain and the PCR products of ~3000 bp in the *gspk-2* and *gspk-3* mutant strains  
 939 document the *AphVIII* insertions.

940

941

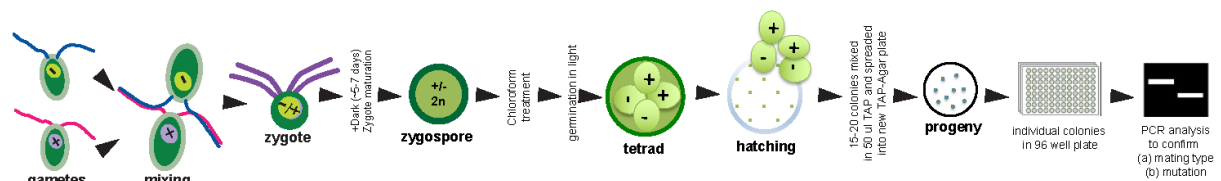

942

943

944 **Supplementary Fig. 2: Graphical overview of method for obtaining progeny of**  
 945 **desired genotypes from crosses of *Chlamydomonas* gametes.**

946



947

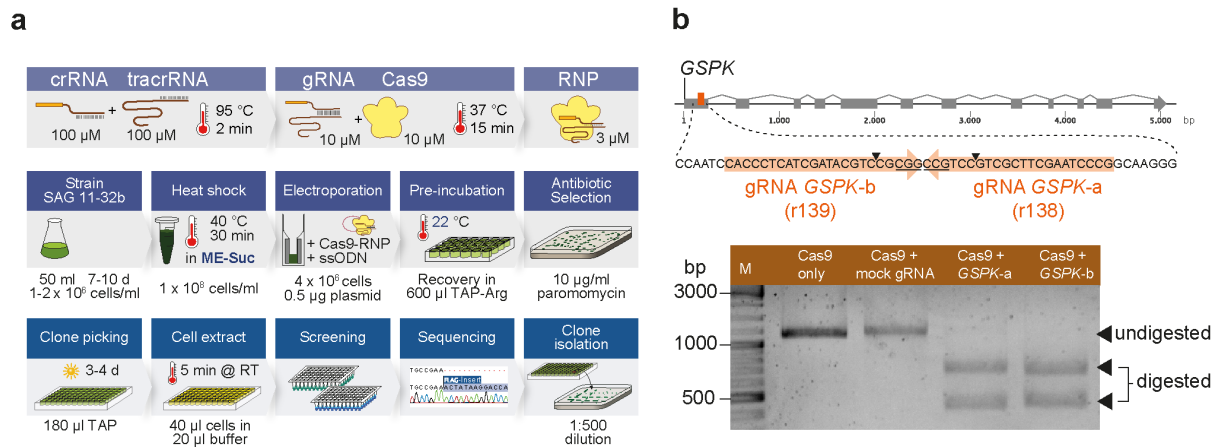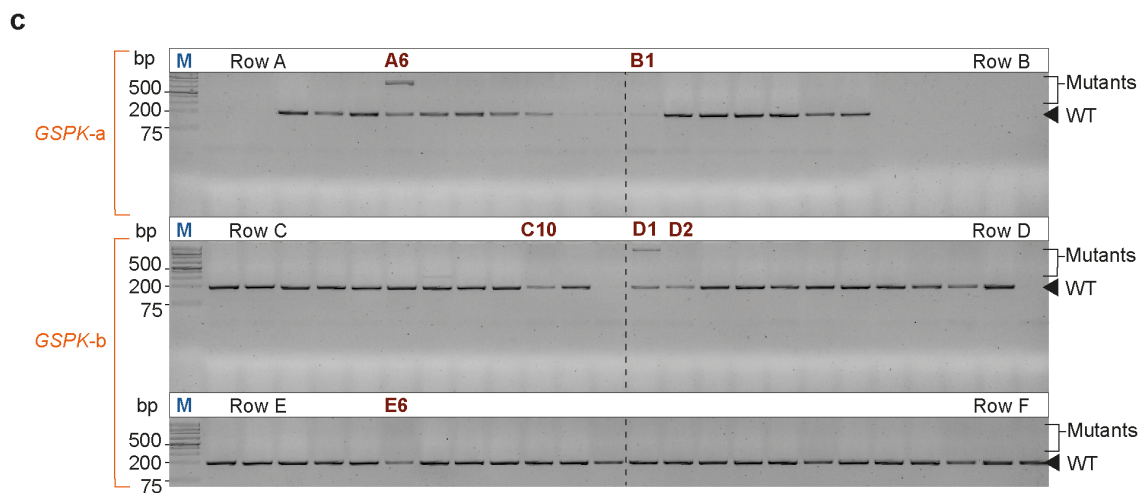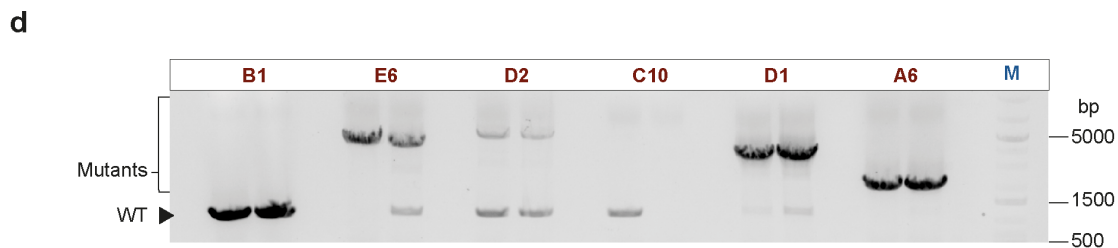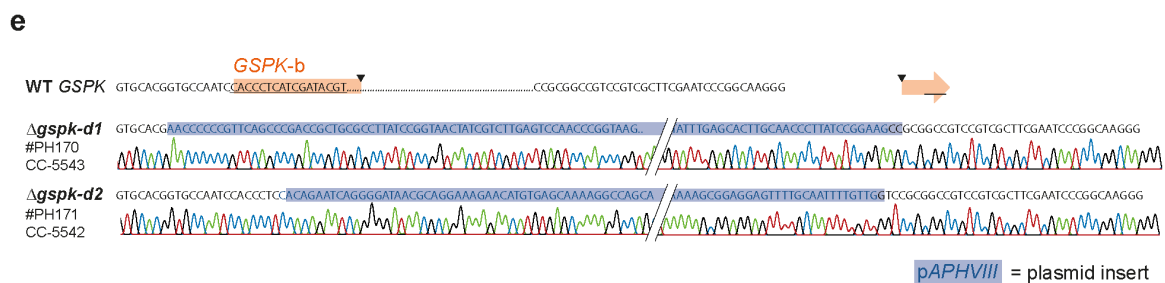

948

949

950

951

952 **Supplementary Fig. 3: Generation of  $\Delta gspk-d2$  CRISPR mutant.**

953 **a.** Graphical overview of the methodological steps for the generation of a *GSPK*  
954 mutant with CRISPR-Cas9 ribonucleoproteins (Cas9-RNPs). Taken and adapted from  
955 (Kelterborn, 2020)

956 **b.** *GSPK* gene locus with two Cas9 target sites selected with the CRISPOR algorithm  
957 (Concordet and Haeussler, 2018). Efficiency of the two selected guide RNAs (gRNAs)  
958 was tested by *in-vitro* digestion as described in (Kelterborn, 2020). A PCR product  
959 spanning both target sites was incubated with only Cas9 protein, with Cas9-RNPs  
960 using a non-targeting mock gRNA, or with Cas9-RNPs assembled with *GSPK-a* or  
961 *GSPK-b* gRNA. The two lower DNA bands indicate effective Cas9-induced cleavage  
962 at the *GSPK-a* and *GSPK-b* target site.

963 **c.** Single colonies transformed with *GSPK-a* or *GSPK-b* Cas9-RNPs were analyzed  
964 with a short colony-PCR spanning 197 bp containing both target sites. PCR bands  
965 with a different size (clone A6, C7 and D1) or different intensity than *WT* bands (clones  
966 A1, A2, A11, A12, C10, C12, D2, D10, E6) potentially indicate a mutated *GSPK* locus.

967 **d.** Clone A6, B1, C10, D1, D2, E6 were selected for further analysis with a larger locus  
968 PCR (1157 bp) and using longer elongation times (3 min). PCR analysis reveal PCR  
969 bands with *WT* size (B1), large insertions (A6, D1, D2 and E6) or missing PCR bands  
970 (C10). A lower PCR band (~1100 bp) can be seen in E6, D2, C10 and D1, and  
971 potentially derives from a mixture of mutant and *WT* cells.

972 **e.** Clone  $\Delta gspk-d1$  and  $\Delta gspk-d2$  were singled out to remove remaining *WT* cells and  
973 the mutation in the *GSPK* locus was confirmed by sequencing analysis. Both clones  
974 show large insertions of the *pAPHVIII* marker plasmid leading to a premature stop  
975 codon and consequently to disrupted *GSPK* gene expression. Cell-cell fusion results  
976 are shown for clone  $\Delta gspk-d2$  CRISPR mutant.

977

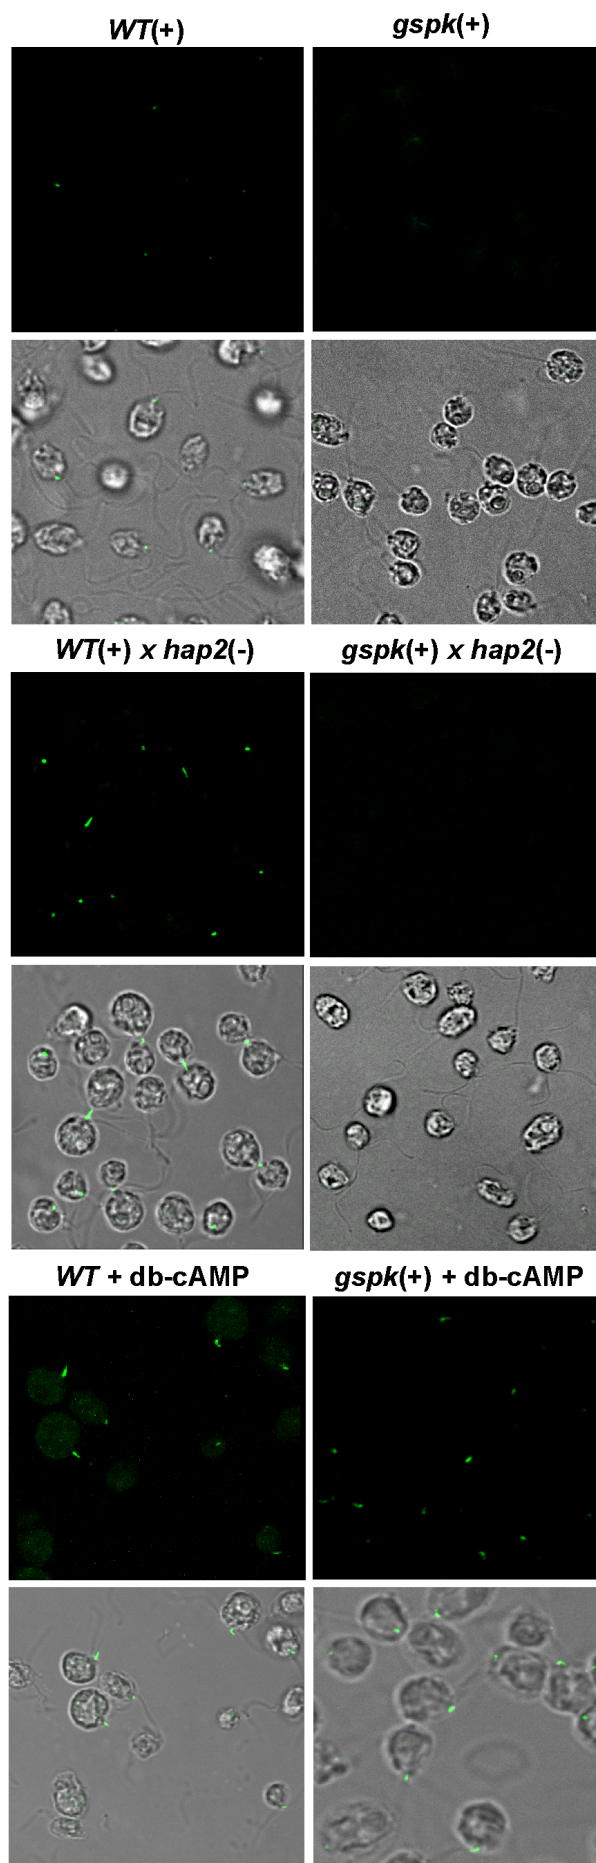

979 **Supplementary Fig. 4:** Ciliary adhesion induces formation of actin-filled fertilization  
980 tubules in *WT(+)* gametes but not in *gspk plus* gametes. Fluorescence images of cells  
981 stained with Alexa 488 phalloidin showed fertilization tubules in mixtures of *WT(+)* and  
982 *hap2(-)* gametes, but not in mixtures of *gspk(+)* and *hap2(-)* gametes (upper panel).  
983 Unmixed *WT(+)* and *gspk(+)* gametes lack fertilization tubules (control, middle panel).  
984 *gspk(+)* gametes activated with db-cAMP buffer formed fertilization tubules similarly  
985 to *WT(+)* gametes (lower panel).

986

987 **Supplementary References:**

988 Concordet, J.P., and Haeussler, M. (2018). CRISPOR: intuitive guide selection for  
989 CRISPR/Cas9 genome editing experiments and screens. *Nucleic Acids Res* 46,  
990 W242-W245.

991 Kelterborn, S. (2020). Gen-Editierung von Photorezeptorgenen in der Grünalge  
992 *Chlamydomonas reinhardtii* mithilfe des CRISPR/Cas9-Systems. (Humboldt-  
993 Universität zu Berlin).

994

995
